# Supplementary material for: Risk of Malnutrition upon Admission and after Discharge in Acutely Admitted Older Medical Patients: A Prospective Observational Study
Source: MDPI journal article supplement (doi:10.3390/nu13082757), 2021-08-11
Supplement: s1 [file s1]

## Supplementary materials

Table S1. Baseline characteristics of participants who completed follow-up and those who were lost to follow-up.

| Variable                                                  | Participants who completed follow-up |                     | Participants who were lost to follow-up |                     | p-value |
|-----------------------------------------------------------|--------------------------------------|---------------------|-----------------------------------------|---------------------|---------|
|                                                           | n                                    |                     | n                                       |                     |         |
| Age, years, median (IQR)                                  | 93                                   | 76.8 (72.2;83.0)    | 34                                      | 81.5 (73.4;87.0)    | 0.22*   |
| Sex, male, n (%)                                          | 93                                   | 41 (44)             | 34                                      | 15 (44)             | 1       |
| Smoking, n (%)                                            | 93                                   | 14 (15)             | 34                                      | 5 (15)              | 0.96    |
| <b>Education</b>                                          |                                      |                     |                                         |                     | 0.55    |
| 1-14 years of school, n (%)                               | 91                                   | 31 (34)             | 34                                      | 15 (44)             |         |
| Skilled worker, n (%)                                     | 91                                   | 45 (50)             | 34                                      | 15 (44)             |         |
| High School+, n (%)                                       | 91                                   | 15 (17)             | 34                                      | 4 (12)              |         |
| Living alone, n (%)                                       | 93                                   | 61 (66)             | 34                                      | 23 (68)             | 0.83    |
| Body weight (kg), mean (SD)                               | 93                                   | 75.1 (19.8)         | 34                                      | 77.9 (18.5)         | 0.48    |
| Height (cm), mean (SD)                                    | 93                                   | 169.7 (9.3)         | 34                                      | 169.5 (11.7)        | 0.91    |
| Body Mass Index (kg/m <sup>2</sup> ), mean (SD)           | 93                                   | 25.9 (5.7)          | 34                                      | 27 (5.1)            | 0.33    |
| Quality of life (EQ-5D-5L index), median (IQR)            | 92                                   | 0.730 (0.552;0.833) | 33                                      | 0.615 (0.426;0.705) | 0.0031* |
| Charlson Comorbidity Index, median (IQR)                  | 93                                   | 1 (0;2)             | 29                                      | 1 (0;2)             | 0.99*   |
| C-Reactive Protein (mg/L), median (IQR)                   | 93                                   | 14 (3.5;57)         | 34                                      | 52 (10;110)         | 0.013*  |
| Maximal hand grip strength (kg), mean (SD)                | 90                                   | 23.6 (10.5)         | 34                                      | 22.1 (10.0)         | 0.49    |
| Functional Recovery Score, median (IQR)                   | 87                                   | 91 (84;99)          | 32                                      | 85 (73;97.5)        | 0.041   |
| Physically inactive, n (%)                                | 93                                   | 35 (38)             | 33                                      | 18 (55)             | 0.09    |
| Fallen within previous year, n (%)                        | 93                                   | 46 (50)             | 34                                      | 19 (56)             | 0.52    |
| <b>Malnutrition or risk of malnutrition according to:</b> |                                      |                     |                                         |                     |         |
| MNA-SF, n (%)                                             | 93                                   | 60 (65)             | 32                                      | 25 (78)             | 0.16    |
| NRS-2002, n (%)                                           | 89                                   | 48 (54)             | 32                                      | 23 (72)             | 0.077   |
| EVS, n (%)                                                | 92                                   | 90 (97.8)           | 33                                      | 32 (97.0)           | 1**     |
| <b>Risk factors for malnutrition</b>                      |                                      |                     |                                         |                     |         |
| Polypharmacy, n (%)                                       | 93                                   | 63 (68)             | 34                                      | 23 (68)             | 1       |
| Risk of dysphagia (EAT10≥3), n(%)                         | 92                                   | 25 (27)             | 32                                      | 9 (27)              | 0.91    |
| Risk of depression (GDS≥2), n(%)                          | 89                                   | 19 (20)             | 33                                      | 8 (24)              | 0.73    |
| <b>Activities of daily living, n(%)</b>                   |                                      |                     |                                         |                     |         |
| Need help cooking                                         | 91                                   | 20 (22)             | 33                                      | 9 (27)              | 0.54    |
| Need help eating                                          | 92                                   | 1 (0.01)            | 33                                      | 0 (0)               | 0.55    |
| Need help groceries shopping                              | 92                                   | 17 (18)             | 33                                      | 8 (24)              | 0.48    |
| <b>Low muscle strength in lower extremities, n (%)</b>    |                                      |                     |                                         |                     |         |
| STS-test<5 or STS-test >5 or <=8 + GS<=0.6 m/s            | 65                                   | 29 (31)             | 17                                      | 14 (41)             | 0.0055  |
| <b>Eating Symptom questionnaire, problems with:</b>       |                                      |                     |                                         |                     |         |
| Chewing, n (%)                                            | 90                                   | 14 (15)             | 33                                      | 7 (21)              | 0.46    |
| Diarrhea, n (%)                                           | 91                                   | 24 (26)             | 33                                      | 10 (29)             | 0.67    |
| Xerostomia, n (%)                                         | 91                                   | 54 (58)             | 33                                      | 22 (65)             | 0.46    |
| Constipation, n (%)                                       | 91                                   | 27 (29)             | 33                                      | 10 (29)             | 0.95    |
| Nausea, n (%)                                             | 91                                   | 36 (39)             | 33                                      | 14 (41)             | 0.77    |
| Pain in the mouth, n (%)                                  | 90                                   | 15 (16)             | 33                                      | 8 (24)              | 0.34    |
| Vomiting                                                  | 91                                   | 15 (17)             | 33                                      | 10 (30)             | 0.09    |
| <b>Cognitive impairment</b>                               |                                      |                     |                                         |                     |         |
| Moderately impaired (OMC= 7-10), n (%)                    | 123                                  | 49 (54)             | 33                                      | 18 (54.5)           | 0.66    |
| Severely impaired (OMC >10) , n (%)                       | 123                                  | 22 (24)             | 33                                      | 6 (18.2)            |         |

\*Wilcoxon's-Rank-Sum-Test

\*\*Fisher's Exact Test

Table 2S. Answers to Mini Nutritional Assessment - Short form questions at baseline and follow-up

|                                                                          |                                                        | At baseline, n (%) | At follow-up, n (%) |
|--------------------------------------------------------------------------|--------------------------------------------------------|--------------------|---------------------|
| Normal nutritional status                                                |                                                        | 30 (24)            | 21 (23)             |
| At risk of malnutrition                                                  |                                                        | 54 (44)            | 41 (45)             |
| Malnourished                                                             |                                                        | 40 (32)            | 29 (32)             |
| Question                                                                 | Answer                                                 | At baseline, n (%) | At follow-up, n (%) |
| Weight loss during the last 3 months                                     | 0 = weight loss greater than 3 kg                      | 33 (26)            | 28 (30)             |
|                                                                          | 1 = does not know                                      | 4 (3)              | 2 (2)               |
|                                                                          | 2 = weight loss between 1 and 3 kg                     | 18 (14)            | 15 (16)             |
|                                                                          | 3 = no weight loss                                     | 70 (56)            | 48 (52)             |
| Mobility                                                                 | 0 = bed or chair bound                                 | 6 (5)              | 4 (4)               |
|                                                                          | 1 = able to get out of bed / chair but does not go out | 30 (24)            | 25 (27)             |
|                                                                          | 2 = goes out                                           | 89 (71)            | 64 (69)             |
| Has suffered psychological stress or acute disease in the past 3 months? | 0 = yes                                                | 109 (87)           | 85 (91)             |
|                                                                          | 2 = no                                                 | 17 (13)            | 8 (9)               |
| Neuropsychological problems                                              | 0 = severe dementia or depression                      | 4 (3)              | 4 (4)               |
|                                                                          | 1 = mild depression                                    | 0 (0)              | 0 (0)               |
|                                                                          | 2 = no psychological problems                          | 122 (97)           | 88 (96)             |
| Body Mass Index (BMI)                                                    | 0 = BMI less than 19                                   | 10 (8)             | 10 (11)             |
|                                                                          | 1 = BMI 19 to less than 21                             | 12 (10)            | 7 (8)               |
|                                                                          | 2 = BMI 21 to less than 23                             | 15 (12)            | 19 (20)             |
|                                                                          | 3 = BMI 23 or greater                                  | 90 (71)            | 57 (61)             |

Table 3S, Answers to the Nutritional risk screening 2002 questions at baseline and follow-up

| Primary screening                                                                      | Points - description                                                                                                                                                                                                                                                              | Baseline, n(%)                                                              | Follow-up, n(%)                                                              |
|----------------------------------------------------------------------------------------|-----------------------------------------------------------------------------------------------------------------------------------------------------------------------------------------------------------------------------------------------------------------------------------|-----------------------------------------------------------------------------|------------------------------------------------------------------------------|
| BMI>20.5?                                                                              | 1=Yes<br>0=No                                                                                                                                                                                                                                                                     | 19 (15)<br>107 (85)                                                         | 15 (16)<br>78 (84)                                                           |
| Weight loss within the last three months?                                              | 1=Yes<br>0=No                                                                                                                                                                                                                                                                     | 52 (41)<br>74 (59)                                                          | 44 (48)<br>48 (52)                                                           |
| Decreased dietary intake within the last week?                                         | 1=Yes<br>0=No                                                                                                                                                                                                                                                                     | 72 (58)<br>53 (42)                                                          | 26 (28)<br>67 (72)                                                           |
| Critically ill?                                                                        | 1=Yes<br>0=No                                                                                                                                                                                                                                                                     | 2 (2)<br>121 (98)                                                           | 0 (0)<br>85 (100)                                                            |
| Primary screening score                                                                | 0<br>1<br>2<br>3<br>4                                                                                                                                                                                                                                                             | 39 (32)<br>37 (30)<br>35 (29)<br>12 (10)<br>0 (0)                           | 35 (42)<br>26 (31)<br>18 (21)<br>5 (6)<br>0 (0)                              |
| <b>Secondary screening</b> , performed only in those with at primary screening score>1 |                                                                                                                                                                                                                                                                                   |                                                                             |                                                                              |
| Malnutrition score*                                                                    | 0 – No malnutrition<br>1 – Mild malnutrition<br>2 – Moderate malnutrition<br>3 – Severe malnutrition                                                                                                                                                                              | 2 (2)<br>34 (41)<br>24 (29)<br>23 (28)                                      | 13 (24)<br>18 (33)<br>13 (24)<br>10 (19)                                     |
| Severity of disease**                                                                  | 0 – No disease that increases nutritional requirements<br>1 – Disease that induces light increment of nutritional requirements<br>2 – Disease that induces moderate increment of nutritional requirements<br>3 – Disease that induces large increment of nutritional requirements | 9 (11)<br>68 (80)<br>8 (9)<br>0 (0)                                         | 37 (70)<br>13 (25)<br>3 (6)<br>0 (0)                                         |
| Age correction                                                                         | 1 – Age≥70 years<br>0 – Age<70 years                                                                                                                                                                                                                                              | 74 (86)<br>12 (14)                                                          | 48 (87)<br>7 (13)                                                            |
| Total Secondary screening score                                                        | 0<br>1<br>2<br>3<br>4<br>5<br>6<br>7                                                                                                                                                                                                                                              | 0 (0)<br>3 (4)<br>8 (10)<br>29 (35)<br>20 (24)<br>17 (21)<br>5 (6)<br>0 (0) | 1 (2)<br>11 (21)<br>15 (29)<br>10 (19)<br>12 (23)<br>3 (6)<br>0 (0)<br>0 (0) |

\* 1 is defined as a weight loss larger than 5% of body weight within the last 3 months or a dietary intake between 50% and 75% of nutritional requirements within the last week. 2 is defined as a weight loss larger than 5% of body weight within the last 2 months or a dietary intake between 25% and 50% of nutritional requirements within the last week or a BMI between 18,5 and

---

20,5 and reduced general health state. 3 is defined as a weight loss larger than 5% of body weight within the last 1 months or a dietary intake between 0% and 25% of nutritional requirements within the last week or a BMI below 18,5 and reduced general health state.

\*\* Examples of each caterogy; 1: hip fracture, chronic disease with acute complications (eg. COPD), chronic dialysis, diabetes, cancer; 2: larger surgery, postoperative acute renal failure, apoplexy, Severe pneumonia; 3: Head injury, burn injury larger than 50% of body surface, severe infections (sepsis), patients in intensive therapy.

---

**Table 4S, Answers to questions of the Eating validation Scheme at baseline and follow-up**

| Question                                                                                                                              | Answer<br>Points - description                                                       | Baseline, n (%)               | Follow-up, n (%)              |
|---------------------------------------------------------------------------------------------------------------------------------------|--------------------------------------------------------------------------------------|-------------------------------|-------------------------------|
| <b>Part 1. Eating habits</b>                                                                                                          |                                                                                      |                               |                               |
| 1. How many meals do you eat each day?                                                                                                | 0 – 3 or more<br>1 – 2 or less                                                       | 89 (70)<br>37 (29)            | 75 (81)<br>18 (19)            |
| 2. How many slices of bread do you eat each day? (1 slice of bread id e.g., ½ slice of rye bread, 1 slice of wheat bread, ½ of a bun) | 0 – 4 or more<br>1 – 2 pieces or less<br>* – between 2 and 4                         | 24 (19)<br>31 (25)<br>71 (56) | 18 (19)<br>27 (29)<br>48 (52) |
| # How many potatoes do you eat at a hot meal (rice or spaghetti in equal amounts)?                                                    | 0 – more than 2<br>1 – 2 or less                                                     | 81 (64)<br>44 (35)            | 55 (59)<br>38 (41)            |
| How many glasses of milk do you drink each day (incl. cocoa)?                                                                         | 0 – more than 1 glass<br>* – 1 glass or less                                         | 48 (38)<br>78 (61)            | 24 (26)<br>69 (74)            |
| # How often do you have cheese or fermented milk products?                                                                            | 0 – 2 slices/portions or more every day<br>1 – less than 2 slices/portions every day | 70 (55)<br>54 (43)            | 54 (58)<br>39 (42)            |
| Leaves 25% or more of food uneaten at most meals                                                                                      | 0 - No<br>1 - Yes                                                                    | 59 (47)<br>67 (53)            | 62 (67)<br>31 (33)            |
| <b>Involuntary weight loss within the last month</b>                                                                                  |                                                                                      |                               |                               |
|                                                                                                                                       | 0 - No<br>1 - Yes                                                                    | 78 (61)<br>48 (38)            | 59 (63)<br>34 (37)            |
| <b>Part 2. Are any of the listed nutritional risk factors present?</b>                                                                |                                                                                      |                               |                               |
| Chewing or swallowing problems?                                                                                                       | No<br>Yes                                                                            | 85 (67)<br>40 (32)            | 24 (26)<br>69 (74)            |
| Eating dependency?                                                                                                                    | No<br>Yes                                                                            | 101 (80)<br>25 (20)           | 77 (84)<br>15 (16)            |
| Acute disease or acute change in chronic disease?                                                                                     | No<br>Yes                                                                            | 9 (7)<br>117 (93)             | 82 (89)<br>10 (11)            |
| <b>Part 1, n with 1 point or more.</b>                                                                                                | 1 point                                                                              | 108 (86)                      | 73 (79)                       |
| <b>Part 2, n with a yes in one of the questions.</b>                                                                                  | 1 point                                                                              | 121 (96)                      | 35 (38)                       |
| <b>Total (SUM of part 1 and 2)</b>                                                                                                    |                                                                                      |                               |                               |
|                                                                                                                                       | 0 points – no risk of malnutrition                                                   | 3 (2)                         | 14 (15)                       |
|                                                                                                                                       | 1 point- at risk of malnutrition                                                     | 16 (13)                       | 49 (53)                       |
|                                                                                                                                       | 2 points – will benefit from a nutritional intervention                              | 106 (85)                      | 29 (32)                       |
| *Check next question marked with a #                                                                                                  |                                                                                      |                               |                               |
